# Supplementary material for: Engineered migrasomes provide a robust and thermally stable vaccination platform
Source: eLife journal article supplement (doi:10.7554/elife.97621), 2024-05-20
Supplement: fig3-data1 [file Figure 3- source data 1.pdf › Figure 3- source data 1.pdf]

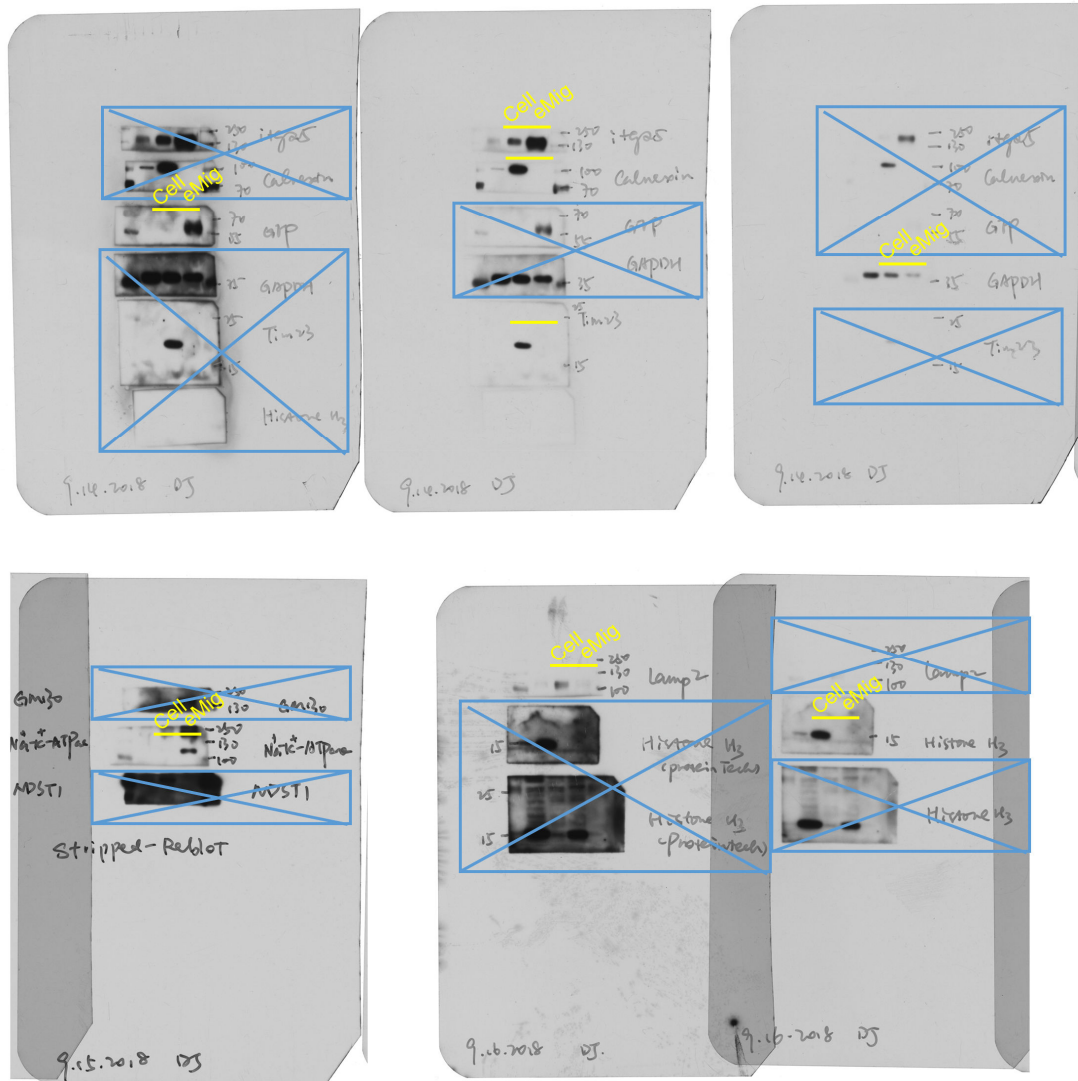

**Figure 3, Source Data 1.** Original films corresponding to Figure 3F. Rainbow molecular weight markers were employed and labeled. The corresponding primary antibodies were also labeled.
