# Supplementary material for: Engineered migrasomes provide a robust and thermally stable vaccination platform
Source: eLife journal article supplement (doi:10.7554/elife.97621), 2024-05-20
Supplement: fig5-data1 [file Figure 5-source data 1.pdf › Figure 5-source data 1.pdf]

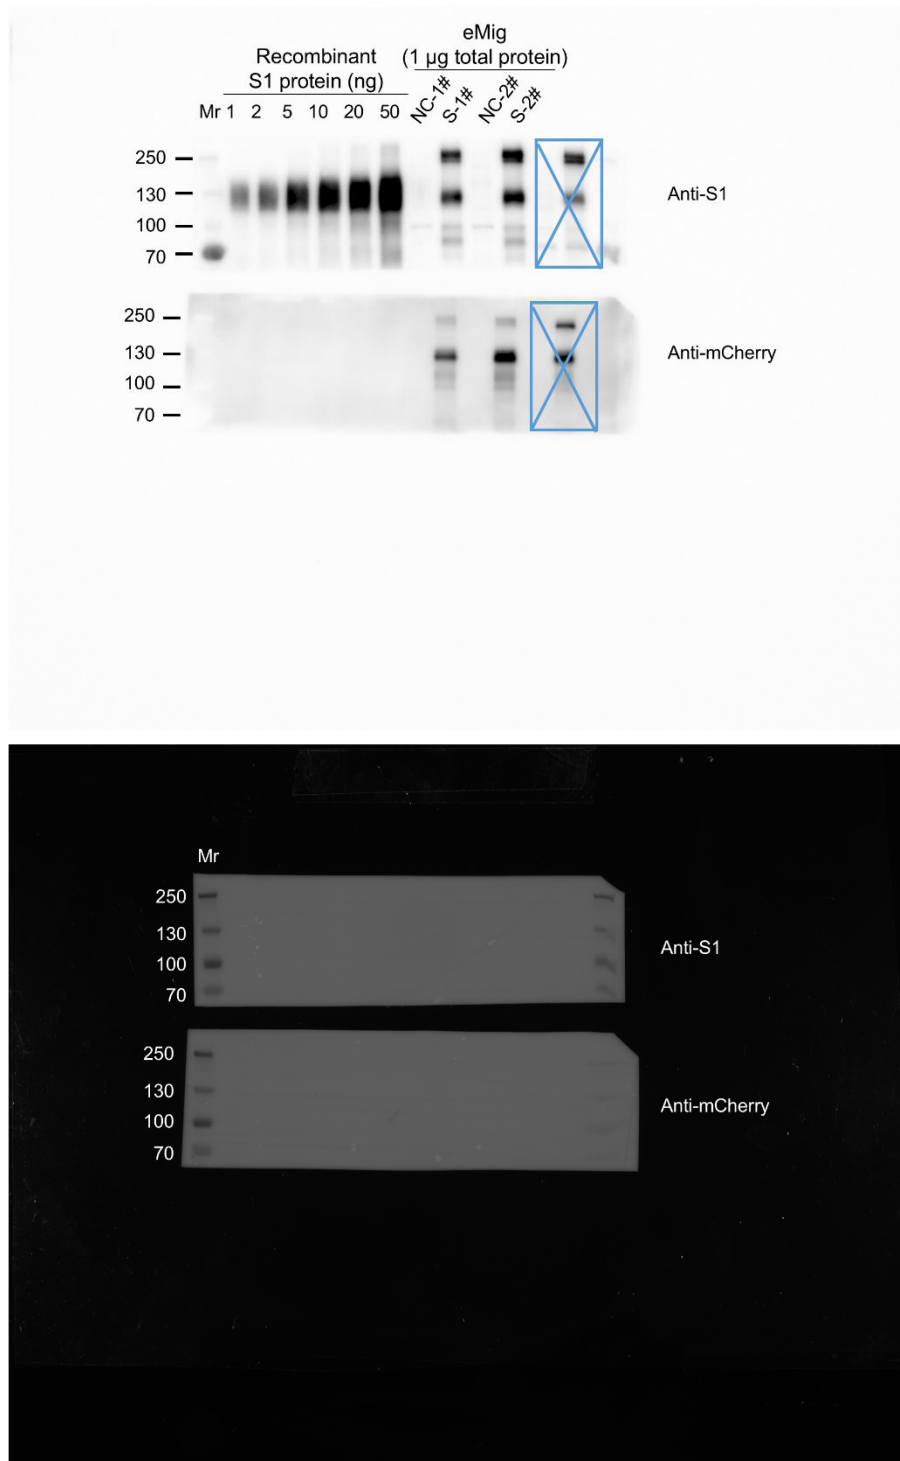

**Figure 5, Source Data 1.** The upper image is the original chemiluminescence blot corresponding to Figure 5B. The lower image is the corresponding colorimetric blot, showing the rainbow molecular weight markers employed.
