# Supplementary material for: Engineered migrasomes provide a robust and thermally stable vaccination platform
Source: eLife. 2025 Nov 13;13:RP97621. doi: 10.7554/eLife.97621 (PMC12614892; doi:10.7554/eLife.97621)
Supplement: Figure 1—source data 1. [file elife-97621-fig1-data1.xlsx]

## Sheet: Figure 1C
152.5 mOsmol	76.3 mOsmol	50.8 mOsmol
1.561	2.501	3.672
2.023	2.257	3.261
1.546	2.494	2.191
1.596	2.263	2.239
1.304	2.403	2.129
1.155	2.685	2.852
1.582	2.597	2.318
1.304	1.639	2.573
1.373	2.51	2.174
1.439	2.187	3.177
1.155	2.112	3.046
0.945	1.977	2.501
1.561	1.737	1.968
1.02	1.977	2.28
1.304	1.63	1.697
1.81	1.171	2.743
1.573	1.304	2.306
1.373	1.63	1.942
2.016	1.697	1.918
1.228	1.516	1.768
1.159	2.103	2.155
1.094	1.975	2.708
1.059	2.247	2.003
1.094	1.492	3.175
1.343	2.441	2.532
1.332	1.699	1.768
1.761	2.582	2.237
1.287	2.187	2.274
1.247	1.588	2.726
1.439	1.561	2.609
1.155	2.609	3.724
1.247	2.336	3.274
0.959	1.63	2.501
1.151	2.191	2.548
1.977	1.561	3.059
1.155	2.039	1.918
1.094	2.129	2.501
1.037	1.582	2.532
1.118	2.66	2.573
1.123	2.11	2.398
1.037	2.187	2.306
1.416	1.304	2.382
1.498	1.159	2.781
1.697	1.561	1.516
1.498	2.421	2.591
1.228	1.697	2.713
1.29	2.17	1.498
1.29	2.713	1.516
1.373	1.426	3.146
1.29	1.155	3.033
1.373	1.63	2.609
1.037	2.288	2.322
1.213	2.917	2.322
1.763	2.884	1.633
1.094	2.07	2.421
1.02	2.257	2.451
1.29	1.729	1.729
1.492	2.112	2.821
1.202	1.439	2.066
1.373	1.845	2.239
1.213	1.426	2.369
1.346	1.968	1.596
1.588	1.768	1.037
1.332	1.977	2.322
1.167	2.716	2.534
1.151	2.646	3.12
1.373	2.403	1.439
1.085	2.634	2.239
1.202	1.697	4.105
1.118	1.845	3.391
1.123	1.155	1.708
0.945	1.25	2.174
1.65	2.174	1.845
1.977	1.573	1.304
1.608	1.363	2.884
1.29	1.171	1.911
1.055	1.202	2.634
1.439	1.383	2.17
1.072	1.019	2.796
0.858	0.773	1.842
0.884	0.858	3.245
0.884	0.905	2.369
1.346	1.918	1.996
1.498	2.039	1.573
1.535	2.322	2.666
1.167	1.363	1.699
1.123	1.304	1.968
0.868	1.832	1.596
1.996	2.103	1.561
1.356	1.968	1.792
0.884	2.103	2.445
0.858	1.304	1.977
0.91	2.039	1.75
1.228	1.639	1.889
1.25	2.359	1.65
0.814	2.237	1.639
0.863	2.112	1.426
1.642	2.035	3.581
1.261	2.208	2.978
0.858	1.862	3.088
0.819	2.239	2.987
1.546	1.628	2.264
1.118	1.336	2.49
1.037	2.016	2.591
0.945	2.016	2.548
1.373	1.213	1.639
1.072	1.845	3.131
0.945	2.145	3.048
1.549	1.656	1.996
1.072	1.968	1.588
1.085	1.171	2.917
0.945	1.29	2.781
1.123	1.942	1.63
1.072	1.697	1.899
1.356	1.996	1.29
0.978	1.332	2.237
0.91	1.628	1.63
0.858	1.737	2.264
1.582	1.426	2.247
1.151	2.341	1.832
1.383	2.023	2.035
1.25	1.516	1.642
0.959	2.053	3.059
1.918	1.287	1.498
1.763	1.118	4.195
0.825	1.155	3.012
0.863	1.037	2.582
1.29	2.884	2.016
1.304	1.802	3.194
1.492	2.501	2.877
1.697	2.639	1.784
1.287	2.847	2.581
0.959	1.899	1.899
1.001	1.461	2.039
1.596	1.968	3.175
1.094	1.768	1.977
0.964	1.516	1.356
1.363	1.085	1.363
1.25	2.059	1.171
1.033	2.129	1.492
1.675	1.561	1.155
0.773	2.191	1.439
0.949	1.373	1.464
0.767	1.442	1.155
1.332	3.652	3.35
0.858	1.588	2.979
0.773	1.383	2.672
1.055	2.609	2.646
1.25	1.373	2.336
0.978	1.784	3.434
1.118	2.832	1.498
1.171	1.761	1.498
0.987	1.426	1.968
1.642	1.25	2.591
1.373	1.892	2.05
1.001	1.516	1.862
1.037	2.701	3.112
1.033	2.239	2.801
1.155	2.398	2.534
1.094	1.202	1.516
1.228	3.059	1.498
1.287	2.053	1.363
0.905	1.094	2.103
1.02	2.129	2.415
1.202	2.788	2.375
1.25	2.998
0.825	2.49
1.02	1.699
1.037	2.51
0.814	2.335
1.02	2.059
1.072	1.426
1.464	2.053
1.155	2.517
1.037	1.596
1.118	1.549
0.698	1.588
0.678	1.363
0.773	1.968
0.819	1.501
1.085	2.554
1.118	1.426
1.094	1.261
1.033	1.363
0.825	2.239
0.964	1.426
0.773	1.596
1.02	1.336
1.159	1.633
1.332	1.633
0.964	1.561
1.123	1.489
1.094	1.65
0.959	4.002
	1.561
	1.832
	1.956
	3.245
	2.609
	2.421
	1.918
	1.842
	2.445
	1.588
	1.633
	1.155
	1.332
	1.899
	1.363
	1.516
	1.501
	2.582
	3.262
	1.975
	2.066
	2.208
	2.66
	2.573
	1.561
	1.862
	3.012
	2.62
	1.94
	1.996
	2.263
	1.304
	1.464
	1.596
	1.228
	2.405
	2.766
	1.716
	1.228
	1.633
	1.75
	2.369
	2.288
	2.31
	2.322
	2.075
	2.208
	1.343
	2.035
	1.65
	1.29
	1.29
	1.763
	2.039
	1.977
	1.596
	1.573
	1.708
	1.085
	1.228
	1.675
	1.921
	1.825
	2.05
	1.832
	1.708
	1.763

## Sheet: Figure 1F
Time (s)	onestep			5step
-314				0	0	13
-253				0	0	13
-243				44.1499	17.1073	13
-183				78.5993	14.5991	13
-122				90.643	11.0349	13
-61	0	0	16	96.3451	6.40152	13
-10	0	0	16
0	75.7319	24.2997	16	98.514	4.26441	13
10	98.1568	5.69187	16	97.7566	4.47055	13
20	88.1382	9.85792	16	97.7566	4.47055	13
30	79.0124	15.9356	16	97.2072	5.45373	13
40	74.4641	17.9388	16	96.5662	5.58625	13
50	66.5888	20.1796	16	96.2813	5.49014	13
61	57.6888	23.2156	16	95.3553	6.52249	13
71	51.8515	27.9606	16	95.3553	6.52249	13
81	48.0221	28.216	16	95.0348	6.59897	13
91	44.0556	27.1369	16	93.6138	6.17011	13
192	23.2449	22.6759	16	80.0368	15.3842	13
293	12.0667	14.7427	16	56.8958	21.6945	13
395	5.98763	12.0729	16	41.1447	22.8265	13
496	1.92388	5.05725	16	31.4474	20.9289	13
597	1.17188	4.6875	16	25.6655	17.7067	13

## Sheet: Figure 1H
LatA(uM)	0	0.25	0.5	1
	2	200	81	344
	16	117	80	231
	12	86	96	191
	9	98	105	193
	11	66	104	148
	9	38	92	151
	6	60	160	192
	12	28	29	149
	8	77	122	44
	5	44	42
		48	117
		1	97
			97
			148

## Sheet: Figure 1I
NC			SWELL1-KD
Mean	SD	N	Mean	SD	N
1	0.344	3	0.138	0.023	3

## Sheet: Figure 1K
NC	SWELL1-KD
1.47	2.013
1.24	1.538
1.387	3.922
1.538	3.263
1.538	2.236
1.47	2.779
1.003	2.236
1.24	2.779
1.47	1.24
1.24	1.24
0.926	2.58
0.926	2.013
1.154	2.58
1.852	1.538
1.771	0.926
1.632	2.445
1.418	2.959
1.387	1.828
1.828	2.72
1.154	1.154
1.47	1.003
1.828	1.003
1.47	2.72
1.24	2.203
1.24	2.396
1.24	3.263
0.769	2.339
1.47	2.013
0.769	2.078
1.31	1.771
0.926	1.387
0.709	1.961
0.769	1.946
1.003	1.828
1.154	1.387
1.694	1.154
1.47	1.387
1.47	1.154
1.694	1.538
2.445	1.003
2.72	2.339
2.236	2.203
2.236	1.154
1.31	1.47
2.396	2.504
1.694	3.591
1.31	1.632
1.47	1.31
1.154	1.538
1.828	2.013
1.387	1.538
1.154	1.694
1.154	2.203
1.003	1.31
1.387	1.387
1.946	1.31
1.946	1.387
1.387	1.47
1.154	2.013
2.203	2.339
2.013	1.538
2.078	2.236
2.176	1.31
	1.24
	1.387
	1.003
	1.31
	1.771
	2.236
	2.883
	2.013
	1.771
	1.694
	1.24
	3.971
	2.176
	2.883
	1.828
	1.538
	2.445
	3.048
	3.101
	1.828
	1.387
	2.72
	1.694
	1.387
	1.31
	1.946
	1.154
	1.24
	1.154
	2.445
	2.779
	3.101
	2.779
	2.013
	3.379
	3.591
	1.47
	2.013
	2.504
	2.203
	2.236
	1.828
	2.339
	2.445
	2.959
	2.58
	2.078
	2.445
	1.694
	2.339
	1.31
	1.946
	2.013
	1.694
	2.58
	2.58
	1.771
	2.339
	1.632
	2.58
	1.961
	2.339
	1.694
	1.852
	2.72
	1.828
	1.771
	1.31
	1.31
	2.339
	2.078
	2.013
	2.445
	1.771
	2.504
	1.538
	2.339
	1.828
	1.47
	2.013
	1.387
	1.387
	1.47
	1.003
	0.769
	1.31
	1.31
	2.203
	1.828
	1.538
	1.694
	1.154
	1.387
	1.387
	1.154
	1.088
	1.387
	1.24
	1.154
	2.959
	2.883
	2.013
	2.339
	1.47

## Sheet: Figure 1M
NaCl	KCl	CsCl
1.449	1.449	1.449
1.242	1.242	1.035
0.828	1.035	1.035
1.449	1.035	1.863
0.828	1.656	1.035
1.035	1.035	1.242
0.828	1.449	1.449
0.828	1.242	1.656
1.035	1.242	2.484
1.242	1.035	1.449
1.035	1.242	3.312
0.828	1.035	2.898
1.035	1.242	2.07
1.035	1.035	2.898
0.828	0.828	1.449
0.828	1.242	1.242
0.828	1.035	1.035
0.828	1.242	1.656
	1.035	1.242
	0.828	1.242
	0.828	1.035
	1.449	3.105
	1.656	3.105
	1.242	1.449
	0.828	1.449
	1.449	1.035
	1.242	2.07
	1.035	3.312
	1.449	1.242
	1.035	1.242
	1.242	1.242
	1.449	1.449
	1.035	1.656
	1.656	1.035
	1.449	1.449
	1.656	0.828
	1.035	1.242
	1.242	1.035
	1.242	1.035
	1.242	1.035
	1.242	1.035
	1.035	1.035
	1.035	0.828
	1.449	1.035
	1.035	1.242
	1.242	1.242
	1.449	1.035
	1.035	1.242
	1.449	1.242
	1.449	1.242
	1.035	1.035
	1.242	1.035
	1.656	0.828
	1.449	1.035
	1.035	0.828
	1.449	0.828
	1.449	1.035
	1.035	1.242
	1.242	1.035
	1.035	1.242
	1.449	1.449
	1.449	1.242
	1.035	1.863
	1.449	1.242
	1.656	1.035
	1.656	1.035
	1.242	1.242
	1.035	1.035
	1.035	1.035
	1.863	1.035
	1.242	1.035
	1.656	1.449
	1.242	4.554
	1.449	1.242
	1.242	1.242
	1.242	1.449
	1.242	1.242
	1.035	1.449
	1.449	1.449
	1.242	0.828
	1.449	1.656
	1.449	1.242
	1.449	2.07
	1.035	2.277
	1.242	1.656
	1.863	1.242
	1.035	0.828
	1.035	1.242
	1.449	1.242
	1.863	0.828
	1.863	1.242
	1.449	1.035
	2.07	2.898
	1.449	1.656
	1.449	1.656
	1.656	2.691
	1.242	1.242
	1.242	2.07
	1.656	1.656
	1.242	1.242
	1.035	3.519
	2.277	3.105
	2.484	2.277
	3.519	1.656
	1.863	1.863
	1.656	2.691
	1.449	1.449
	2.07	1.863
	1.242	1.449
	1.449	2.07
	2.691	1.656
	1.449	1.035
	1.863	1.656
	1.656	1.035
	1.035	1.035
	1.242	1.035
	1.449	1.035
	1.242	1.242
	1.242	1.242
		1.449
		1.035
		1.449
		1.035
		1.035
		1.035
		1.449
		1.035
		1.242
		1.863
		1.242
		1.242
		1.035
		1.449
		1.242
		1.656
		1.863
		1.863
		1.242
		1.449
		1.035
		1.035
		0.828
		0.828
		0.828
		1.449
		1.449
		1.863
		1.449
		1.656
		1.449
		2.07
		1.656
		1.242
		1.242
		0.828
		1.035
		1.449
		1.035
		1.449
		1.035
		1.242
		1.242
		2.07
		1.242
		1.242
		1.242
		1.242
		1.656
		1.242
		1.035
		1.035
		1.242
		1.242
		1.449
		0.828
		1.656
		2.277
		1.449
		1.449
		2.07
		1.863
		3.105
		1.656
		1.242
		1.242
		1.035
		1.035
		1.449
		1.656
		1.242
		1.035
		1.863
		1.242
		1.449
		1.449
		1.242
		3.105
		1.242
		1.035
		1.242
		1.035
		1.242
		1.035
