# Supplementary material for: Engineered migrasomes provide a robust and thermally stable vaccination platform
Source: eLife. 2025 Nov 13;13:RP97621. doi: 10.7554/eLife.97621 (PMC12614892; doi:10.7554/eLife.97621)
Supplement: Figure 2—source data 1. [file elife-97621-fig2-data1.xlsx]

## Sheet: Figure 2B
mc	T4-mc
1	83
107	97
82	148
8	35
9	58
2	45
60	116
50	65
45	59
23	78
109	146
138	54
5	127
40	52
36	132
43	116
25	188
43	108
33	78
4	138
24	33
8	26
9	158
11	76
4	70
7	98
12	126
41	33
6	58
10	63
72	219
60	127
101	96
4	134
84	70
116	65
72	68
44	150
8	108
13	38
60	48
8	93
57	118
72	101
77	54
40	39
42	48
44	62
27	160
40	248
24	151
21	56
41	65

## Sheet: Figure 2C
mc	CD82-mc
11	71
14	100
57	111
60	94
45	49
67	103
28	58
9	43
15	38
95	88
130	48
7	91
43	104
34	116
36	93
28	78
48	60
21	68
30	34
27	46
36	80
20	71
35	29
56	26
60	38
24	54
	124
	63
	23
	54
	37
	37
	85
	130
	132
	90
	85
	147
	85
	75
	47
	94
	57
	28

## Sheet: Figure 2D
mc	Tspan1-mc
51	75
33	93
57	70
35	50
42	69
22	65
51	99
73	103
32	65
28	37
33	51
50	112
35	40
27	89
30	42
32	35
45	39
89	51
98	53
13	82
9	119
41	46
53	49
30	58
43	130
32	50
38	26
78	57
15	43
20	47
22	178
	86
	43
	61
	106
	51
	45
	63
	71
	45
	47
	94
	57
	28

## Sheet: Figure 2F
NC	MβCD
65	26
69	41
121	23
52	19
120	33
54	19
43	16
43	33
265	21
218	44
66	43
40	22
64	17
48	33
99	26
66	22
91	25
82	32
127	24
67	29
132	15
115	18
105	17
138	14
115	12
105	14
92	24
145	25
118	29
145	19
115	21
129	36
96	12
61	10
41	17
162	6
107	5
79	3
90	27
59	20
147	5
130	42
170	19
67	14
85	26
53	43
121	39
135	27
93	6
90	21
142	28
96	17
114	17
92	26
104	72
124	31
	32
	11

## Sheet: Figure 2H
DMSO	SMS2-IN-1
189	37
83	20
50	15
38	10
74	45
79	34
126	9
28	36
53	19
56	12
60	8
27	35
42	39
72	5
94	39
133	58
64	19
110	38
82	66
22	2
35	34
106	29
35	14
60	22
85	42
149	44
70	54
57	50
106	52
127	3
49	13
51	13
62	9
93	32
190	28
63	11
191	22
47	36
45	40
111	22
51	20
71	19
122	47
89	14
168	17
79	51
70
51
78
49
64
