# Supplementary material for: Engineered migrasomes provide a robust and thermally stable vaccination platform
Source: eLife. 2025 Nov 13;13:RP97621. doi: 10.7554/eLife.97621 (PMC12614892; doi:10.7554/eLife.97621)
Supplement: Figure 3—source data 3. [file elife-97621-fig3-data3.xlsx]

## Sheet: Figure 3C
radius (um)		Bin Center	# values
1.726		0.6	1693
1.208		0.8	771
1.036		1	584
1.554		1.2	526
1.208		1.4	356
0.691		1.6	268
1.554		1.8	324
1.381		2	91
1.554		2.2	54
0.863		2.4	33
0.863		2.6	18
0.863		2.8	5
1.208		3	1
1.036		3.2	1
1.036		3.4	0
0.691
1.726
1.899
1.036
1.554
1.899
1.208
1.208
1.726
1.899
1.381
1.036
0.691
1.899
1.036
0.863
1.899
1.554
1.381
0.863
1.208
1.036
1.381
1.726
0.863
1.036
0.691
1.726
1.208
1.036
1.554
1.208
1.899
0.691
0.691
1.726
1.726
1.726
1.208
1.554
1.726
1.726
1.726
0.691
1.899
0.863
1.381
0.691
1.381
1.381
1.726
1.036
0.691
1.036
1.036
1.554
1.726
1.036
1.554
1.899
0.863
1.208
1.208
0.691
1.899
1.554
1.726
0.691
0.691
1.036
1.554
2.417
1.036
0.691
1.036
0.863
2.935
0.691
1.381
1.381
0.691
0.863
0.691
1.036
1.208
0.691
1.554
1.036
1.554
2.244
1.381
0.691
1.381
2.417
1.208
0.691
1.036
0.691
1.381
0.691
2.59
0.691
1.036
0.691
1.036
1.554
1.208
0.863
0.691
1.036
0.691
1.554
0.691
2.244
1.381
1.381
1.554
1.554
1.554
1.036
0.691
0.691
1.381
0.691
0.863
0.691
2.59
0.863
0.863
1.554
1.554
0.863
1.036
1.554
1.554
2.59
1.554
1.554
1.381
1.036
0.691
0.691
1.208
1.208
1.208
0.863
0.691
2.244
1.381
1.036
1.036
1.381
0.691
1.208
0.863
2.244
1.208
0.691
1.036
0.863
0.863
0.863
0.863
1.036
1.381
1.208
1.381
0.691
1.381
0.863
0.863
1.036
1.036
0.863
0.691
1.381
2.072
1.208
1.381
0.691
0.863
1.036
0.863
0.863
0.863
1.208
1.036
0.691
1.381
0.691
1.036
1.036
2.072
1.036
1.036
1.036
0.691
1.381
1.036
1.208
1.036
1.208
2.072
1.036
0.691
0.863
0.691
1.208
1.208
1.036
1.036
0.863
2.072
1.208
0.691
0.691
1.208
0.691
1.036
0.863
0.863
1.036
0.863
0.863
1.036
0.863
1.036
1.036
0.863
0.691
1.036
0.691
0.863
0.863
1.036
0.691
1.208
0.863
1.036
1.036
1.208
0.691
0.691
1.036
0.691
0.691
0.691
0.691
0.691
0.691
0.863
0.691
0.691
0.863
1.208
1.036
0.691
0.691
0.863
1.208
0.691
2.072
1.036
0.863
1.208
0.691
0.691
1.036
0.691
1.208
1.036
0.691
1.208
1.208
1.036
1.036
0.691
0.691
0.863
0.863
2.072
1.208
0.691
1.208
1.208
0.691
0.691
0.691
0.863
1.036
0.691
0.691
0.863
0.863
1.036
0.691
0.691
0.691
0.691
0.691
0.863
1.036
0.691
0.691
0.863
0.863
1.208
0.691
0.863
1.036
0.691
0.863
0.863
0.691
1.036
0.691
0.691
0.863
0.691
0.691
0.691
0.691
0.691
2.072
1.036
0.691
0.691
1.036
1.208
1.036
0.691
0.691
0.691
0.691
0.863
0.691
0.863
1.036
0.863
1.036
0.691
0.863
0.863
1.036
0.691
1.036
1.208
0.863
1.208
1.036
0.863
0.863
0.691
1.208
0.863
0.691
0.863
0.691
0.863
0.691
0.691
0.691
1.036
1.208
0.863
1.036
1.036
1.036
0.691
0.863
0.691
0.691
0.863
1.208
1.036
1.036
0.863
0.691
0.691
1.036
0.691
1.208
0.691
0.863
0.691
0.691
0.691
1.036
0.863
0.863
0.863
0.863
0.691
0.691
1.208
0.691
0.863
1.036
0.863
1.036
0.691
0.691
1.036
0.863
0.691
0.691
0.691
0.691
0.863
0.863
0.691
0.691
1.036
0.691
0.863
0.691
0.863
0.691
0.691
0.691
0.691
0.863
0.691
0.863
0.691
0.691
0.691
0.691
0.691
0.691
0.691
0.691
0.863
0.863
0.863
0.863
0.691
0.691
0.863
0.691
0.691
0.691
0.691
0.863
0.691
0.691
0.863
0.691
0.691
0.691
0.691
0.691
0.691
0.691
0.691
0.691
0.691
0.691
0.691
0.691
0.691
0.691
0.691
0.691
0.691
0.691
0.863
1.726
1.554
0.863
1.726
0.863
1.554
1.036
1.554
0.863
1.381
0.863
1.726
1.036
1.036
1.381
1.036
1.899
1.726
1.726
1.899
1.036
1.554
2.244
1.208
1.036
2.417
1.554
1.381
1.726
1.381
0.863
1.381
1.381
0.863
1.554
1.381
1.381
1.381
1.208
2.244
1.036
1.036
2.072
1.036
1.036
2.417
2.59
2.072
1.208
2.072
1.208
1.208
1.208
1.208
1.208
1.208
1.208
1.899
1.381
1.726
1.208
1.208
1.726
1.554
1.036
1.554
2.072
0.863
1.208
1.208
1.208
1.381
2.244
1.554
1.381
1.381
1.554
0.863
1.554
1.554
2.244
0.863
0.863
0.863
0.863
0.863
0.863
0.863
0.863
0.863
0.863
0.863
0.863
0.863
1.036
1.381
1.554
1.036
1.208
1.554
1.899
1.899
0.691
2.244
0.691
0.863
0.863
0.691
2.072
0.691
1.381
1.036
1.726
1.036
1.036
1.554
0.691
1.554
1.726
1.036
0.691
1.381
1.036
0.691
1.554
1.726
1.554
1.554
1.554
1.726
1.381
1.381
1.554
2.244
1.554
0.691
1.381
0.691
1.381
0.691
2.59
2.072
2.59
0.691
0.691
0.691
0.691
0.691
0.691
0.691
0.691
0.691
0.691
0.691
0.691
0.691
0.691
0.691
0.691
0.691
0.691
0.691
0.691
0.691
0.691
0.863
0.863
1.554
1.036
1.554
1.208
1.726
0.863
1.381
1.208
1.036
1.036
1.036
1.726
1.554
1.208
1.036
1.726
0.691
1.381
0.691
0.863
1.036
1.381
2.762
0.691
0.691
2.59
0.691
0.691
2.59
1.208
0.863
0.863
1.036
2.59
0.863
1.208
1.208
1.208
0.691
0.691
0.863
1.554
0.691
0.691
1.554
0.691
1.554
1.208
0.691
2.244
0.691
0.863
1.208
0.691
0.863
1.208
0.691
0.691
0.863
1.208
0.691
0.691
0.691
0.691
0.863
1.554
0.863
1.381
1.726
1.208
1.554
1.208
0.691
2.072
1.381
1.899
0.863
0.691
0.863
1.036
2.072
0.691
0.691
1.036
0.691
0.691
2.244
1.899
1.036
1.381
1.381
1.899
1.208
1.036
1.036
1.208
1.036
0.691
1.208
1.208
0.691
0.691
1.726
0.691
0.691
0.691
1.208
1.726
0.691
0.691
1.208
1.208
0.691
1.208
0.691
0.691
0.691
1.208
0.691
1.208
1.208
1.381
1.036
1.554
0.863
1.208
1.208
1.554
1.726
1.726
1.036
1.036
1.726
1.554
1.381
0.691
0.863
0.691
0.863
0.863
0.863
2.072
0.691
0.691
2.244
2.072
0.691
1.036
0.691
1.554
1.899
2.59
1.554
0.691
0.691
0.863
1.554
1.208
1.554
0.863
1.381
1.381
1.899
0.691
0.691
1.381
1.208
1.381
1.208
1.208
0.863
0.863
0.863
1.208
1.208
0.691
0.691
0.691
0.691
0.691
0.691
0.691
0.691
0.691
0.691
0.691
0.691
0.691
0.691
0.691
0.691
0.691
1.381
1.899
1.899
1.208
1.208
1.036
1.726
2.072
0.863
0.863
0.691
1.554
0.691
2.072
0.863
0.691
1.381
0.863
0.691
2.417
0.863
0.691
0.691
0.863
0.691
0.691
2.417
0.691
0.691
0.691
0.691
0.691
0.691
0.691
0.691
0.691
1.036
1.554
2.072
1.899
0.863
0.691
1.208
3.28
0.691
0.691
1.726
0.691
0.691
0.691
0.691
1.726
0.691
1.036
0.691
1.726
1.208
0.863
1.381
1.208
1.554
1.381
0.691
0.691
1.208
1.381
0.691
0.691
1.036
1.554
0.863
1.036
1.554
1.036
1.554
0.691
0.691
2.59
1.208
2.072
0.691
0.691
0.863
0.691
0.691
0.691
0.691
0.691
0.691
0.691
0.863
0.691
0.691
0.691
0.863
0.691
0.863
0.691
0.863
1.381
2.072
0.691
1.036
1.554
0.691
0.691
1.381
0.691
0.691
0.691
0.691
1.726
0.691
1.554
1.036
0.691
0.691
0.691
0.691
0.691
0.691
0.691
0.691
0.691
0.691
0.691
0.691
0.691
0.691
1.036
1.726
1.208
1.381
1.036
1.208
0.863
1.208
0.691
0.691
2.244
0.691
0.863
1.208
0.863
0.691
0.691
1.036
0.691
0.863
0.691
0.691
1.036
1.036
0.691
0.691
0.691
0.691
0.691
1.036
1.036
0.691
0.691
1.381
0.691
1.036
0.691
0.863
0.863
2.417
2.072
0.863
1.036
1.554
1.554
0.691
0.691
1.036
2.417
0.691
0.691
0.691
0.863
1.036
0.691
0.691
0.691
0.691
0.691
2.072
1.208
1.381
0.863
0.863
0.863
1.554
2.417
1.554
0.691
0.691
0.691
0.691
0.691
0.691
0.691
0.691
0.863
0.863
0.863
0.691
0.691
0.691
0.863
0.863
0.691
0.691
0.691
1.208
0.691
2.244
1.554
0.691
0.691
1.036
0.691
0.691
1.036
0.691
1.036
0.863
0.863
2.59
0.691
0.691
0.691
0.863
0.691
0.691
0.691
0.691
0.691
0.691
0.691
0.691
0.863
0.691
1.381
1.036
1.208
0.691
0.863
1.726
1.208
0.691
1.208
0.691
1.036
0.691
0.691
1.208
0.863
0.863
0.863
0.863
0.863
0.691
0.863
0.691
0.691
0.691
1.381
0.691
1.381
1.899
0.863
0.691
1.036
0.863
1.036
0.691
0.691
0.863
0.691
1.036
0.691
0.691
0.691
0.691
0.691
0.691
2.244
1.208
1.726
0.691
0.691
0.691
1.208
0.691
1.899
1.726
0.863
1.036
0.691
0.691
0.691
0.691
0.863
0.863
1.381
1.036
1.036
1.381
1.899
1.208
0.691
1.381
0.691
0.863
1.899
0.863
1.554
1.554
1.208
0.691
0.863
1.554
0.691
1.036
1.726
1.726
1.899
1.726
1.726
0.863
1.554
1.036
0.863
0.863
0.691
1.726
1.726
1.899
1.208
1.381
0.863
0.863
1.036
1.554
1.036
1.554
1.208
1.554
0.863
1.381
1.554
0.691
1.036
1.036
0.863
1.208
1.036
1.381
0.691
1.036
1.036
1.036
1.208
0.691
1.381
1.208
1.208
1.036
0.691
1.036
1.381
0.863
1.381
0.863
1.036
0.863
1.381
1.208
0.863
1.036
1.036
0.691
0.691
1.036
1.036
1.208
1.208
1.036
1.208
1.036
1.036
1.208
0.691
1.208
1.208
0.863
0.863
1.036
1.036
0.691
0.863
0.691
0.863
1.381
0.863
0.863
0.691
1.381
0.691
0.691
0.863
0.863
0.691
0.863
0.691
0.863
0.691
0.863
0.691
0.691
0.863
0.863
0.691
0.691
0.691
0.691
0.691
0.863
0.691
0.863
0.863
0.691
0.691
0.691
0.691
0.691
0.691
0.691
0.691
0.691
0.691
0.691
0.691
0.691
0.691
0.691
0.691
0.691
0.691
0.691
0.691
0.691
0.691
0.691
0.691
0.691
0.691
0.691
0.691
0.691
0.691
0.691
0.691
0.691
0.691
0.691
0.691
0.691
0.691
0.691
1.381
1.726
1.726
1.208
1.554
1.036
2.072
1.381
1.899
0.863
1.208
1.381
0.863
1.036
0.863
2.417
1.036
0.863
1.036
1.208
1.036
1.036
1.208
1.208
1.036
1.036
1.036
1.208
1.208
1.208
1.208
1.208
1.208
1.208
1.208
1.208
1.381
1.554
0.863
1.899
1.381
1.208
1.208
1.554
1.726
1.381
1.036
1.726
1.554
0.863
1.036
1.036
1.726
1.554
0.863
0.863
1.899
0.863
0.863
0.863
1.208
1.208
1.381
1.899
1.726
1.381
1.554
1.381
0.863
1.036
1.899
0.691
1.899
1.554
1.726
0.691
0.691
0.691
0.691
1.036
2.072
1.036
0.691
1.036
1.554
2.072
1.554
0.691
0.691
1.726
0.691
1.899
1.554
0.691
1.554
1.554
0.863
1.381
1.899
0.863
1.208
1.381
2.244
0.691
1.381
0.863
1.208
1.899
2.417
0.863
0.691
1.208
0.691
2.59
0.691
1.381
2.59
0.863
0.863
1.899
1.208
1.726
1.726
1.036
1.208
0.691
1.036
1.381
1.726
1.726
0.691
2.072
0.691
1.208
1.208
1.208
0.691
0.691
0.691
0.691
0.691
0.691
0.691
0.691
0.691
0.691
0.691
0.691
1.381
1.208
0.863
0.863
1.554
1.208
1.726
1.726
1.381
0.863
1.036
1.036
0.691
1.381
1.036
1.036
0.863
0.691
1.036
0.863
1.036
1.036
1.036
0.691
0.691
0.863
0.863
0.863
0.863
1.554
0.691
1.726
1.208
1.381
1.899
0.691
1.899
0.691
1.036
1.036
1.208
2.417
2.244
0.691
0.863
0.691
2.417
2.072
0.863
0.863
0.691
0.691
0.691
0.691
0.691
0.863
1.381
1.208
1.381
1.726
0.691
1.554
1.899
1.554
1.036
1.726
1.036
0.863
0.691
1.208
0.691
1.208
0.863
0.863
0.691
1.208
1.036
0.691
0.691
0.691
0.691
0.691
0.863
1.036
1.554
1.036
0.691
1.726
0.691
1.381
1.036
0.863
0.691
0.691
1.381
2.59
0.863
0.691
1.036
0.691
1.208
2.072
0.691
1.208
0.691
0.691
0.863
1.899
1.899
1.554
1.036
1.036
1.036
1.381
1.554
1.036
1.208
1.554
1.208
0.691
0.691
1.381
0.691
0.691
0.691
0.691
0.691
0.691
0.691
0.691
0.691
0.691
2.072
0.863
1.036
1.726
0.691
1.726
1.554
1.036
1.899
1.208
0.863
0.691
1.899
1.208
1.036
1.554
1.208
1.208
0.691
2.072
0.691
0.691
0.691
0.691
0.691
0.691
0.691
0.691
0.691
0.863
0.863
1.208
1.726
1.554
1.899
0.863
0.863
0.863
0.691
1.036
0.863
0.691
0.863
1.208
0.863
0.691
0.691
0.863
0.691
0.691
2.072
1.381
0.691
1.036
1.381
0.691
1.726
0.863
0.691
0.863
0.691
0.691
1.726
1.208
0.691
0.863
0.691
1.554
1.036
0.863
0.863
1.036
1.208
0.691
0.691
0.691
1.381
1.036
0.691
0.691
1.381
0.863
0.691
1.208
1.036
0.691
1.726
1.208
1.381
2.072
0.691
0.691
0.691
0.691
0.691
0.691
0.691
0.691
0.691
0.691
0.691
0.691
0.691
0.691
0.691
1.208
2.072
1.726
1.554
1.554
0.691
1.036
0.691
1.726
1.036
0.863
0.691
0.863
1.726
0.691
0.691
0.691
0.691
0.691
1.726
1.208
0.691
0.691
0.863
0.691
1.036
0.863
2.072
0.691
0.691
0.691
0.691
0.691
0.691
0.691
0.691
0.691
1.036
0.691
1.554
1.554
1.381
1.381
1.208
0.863
0.863
0.691
0.691
0.691
1.381
1.381
1.554
1.036
1.726
1.899
0.863
0.863
0.863
1.899
1.208
1.036
1.208
1.381
0.863
1.381
0.691
1.208
1.208
1.726
0.863
1.208
0.863
0.863
1.381
2.072
1.381
1.554
2.244
0.691
0.691
1.036
0.863
0.863
1.381
1.381
1.726
1.036
0.691
1.554
0.863
1.036
0.691
0.691
0.863
1.036
0.863
0.863
1.554
0.691
0.863
1.036
0.863
0.863
1.554
0.691
1.381
0.863
1.554
1.381
2.244
1.381
1.036
0.691
1.036
0.863
0.691
2.072
0.691
1.036
1.381
1.381
1.036
0.863
0.691
0.863
0.691
0.691
2.417
0.691
0.691
0.691
0.691
0.691
0.691
0.691
0.691
0.691
0.691
0.691
0.691
0.691
0.691
0.691
0.691
0.691
0.691
0.691
0.691
0.691
0.691
0.691
0.691
0.691
1.208
1.899
0.863
2.244
1.899
1.036
1.381
1.726
1.036
1.036
1.208
0.863
1.036
0.863
1.036
1.208
1.208
1.381
1.036
1.381
1.036
1.208
1.208
2.072
1.208
0.863
1.208
0.863
1.554
0.863
1.036
0.863
0.863
2.072
1.899
1.899
0.863
1.208
1.381
1.208
1.381
1.726
1.208
1.208
1.726
0.691
1.726
1.036
1.899
1.554
1.208
0.863
0.691
2.244
1.036
1.899
1.036
1.381
1.381
0.691
1.208
1.554
1.554
0.691
1.208
0.691
0.691
1.554
1.208
1.726
1.208
1.208
1.726
0.691
0.691
0.691
0.863
1.381
0.863
1.726
1.381
1.208
0.863
0.863
0.863
0.863
0.691
0.863
0.691
0.863
0.691
0.691
1.208
1.208
2.59
1.036
0.863
1.036
0.863
0.691
1.554
1.208
0.691
2.072
1.208
0.691
1.726
1.208
0.691
0.691
1.208
1.208
1.036
0.863
1.554
1.381
0.863
0.863
1.208
1.208
1.899
1.208
1.899
0.863
1.381
1.381
2.244
1.381
1.036
1.381
1.554
0.691
1.208
0.691
0.691
0.691
0.863
0.691
0.863
1.726
1.208
0.691
0.691
1.036
1.036
0.691
0.691
[truncated: 2,726 more rows]

## Sheet: Figure 3H
	Setting at RT(h)	1.5	6	12	24	48
% dextran permeable eMigs	View 1	2.52101	24.8408	50.1818	67.3152	90.3509
	View 2	1.75439	28.7425	46.8992	62.987	87.4317
	View 3	2.91262	26.6272	36.2007	67.1698	88.6364

## Sheet: Figure 3J
Setting at RT(day)	% remaining eMigs
	7e6 eMigs/tube	3e6 eMigs/tube
0	100	100
3	88.4913	72.3508
7	86.1221	59.0438
14	71.9171	42.3569
