# Supplementary material for: Engineered migrasomes provide a robust and thermally stable vaccination platform
Source: eLife. 2025 Nov 13;13:RP97621. doi: 10.7554/eLife.97621 (PMC12614892; doi:10.7554/eLife.97621)
Supplement: Figure 4—source data 3. [file elife-97621-fig4-data3.xlsx]

## Sheet: Figure 4F
	i.v				s.c				nasally
OVA-specific IgG (ng/ml)	683.421	1204.37	597.694	751.554	115.784	33.188	126.4	55.806	19.349	122.384	16.158	36.003

## Sheet: Figure 4G
	1 μg/mouse					3 μg/mouse					10 μg/mouse					20 μg/mouse					40 μg/mouse
OVA-specific IgG (ng/ml)	15.494	25.902	9.056	16.325	37.856	57.346	34.387	91.639	127.469	174.136	182.579	306.167	184.674	167.34	522.909	347.665	197.567	255.136	892.497	847.542	1504.29	941.055	3802.09	1835.29	410.21	712.442

## Sheet: Figure 4H
	Alu/OVA					eM-OVA
OVA-specific IgG (ng/ml)	893.364	1248.66	693.38	1399.12	898.817	1026.29	1371.24	738.139	1353.51	3432.19	287.304

## Sheet: Figure 4I
	Alu/OVA					eM-OVA
IgG1	9600	9600	2400	9600	4800	1200	2400	150	600	2400	0
IgG2b	150	150	150	150	300	2400	4800	4800	2400	9600	1200
IgG2c	0	25	0	0	25	3200	3200	1600	3200	3200	200
IgG3	25	25	25	25	25	800	800	100	400	400	200

## Sheet: Figure 4L
	D0					D3					D7						D14
OVA-specific IgG (ng/ml)	489.506	520.373	641.913	660.554	398.259	1052.41	429.433	541.128	674.235	317.534	701.02	420.771	614.841	446.173	632.629	403.03	363.585	949.245	385.769	411.476	647.639
