# Supplementary material for: Engineered migrasomes provide a robust and thermally stable vaccination platform
Source: eLife. 2025 Nov 13;13:RP97621. doi: 10.7554/eLife.97621 (PMC12614892; doi:10.7554/eLife.97621)
Supplement: Figure 5—source data 3. [file elife-97621-fig5-data3.xlsx]

## Sheet: Figure 5F
	Pre						Primary						Boost
S-specific IgG (ug/ml)	0.084619	0.094569	0.075101	0.084379	0.084138	0.115778	38.843	55.4215	95.4308	39.9038	126.379	81.4054	349.413	594.171	251.181	505.613	324.733	395.282

## Sheet: Figure 5G
	Prime vaccination						Boost vaccination
50	4.46978	0.193843	0.173318	0.04675	0	0.035348
100	17.5599	0.718358	0.13683	1.41391	1.53934	0.923603
200	73.7742	11.8244	8.98518	18.4721	19.6807	14.2303	0.244014	0.22919	0.047891	0.41049	0.098062	0
400	88.3694	51.8814	47.5485	84.9487	65.7925	69.2132	0.099202	0.049031	0.445838	0.174458	0.171038	0.012543
800	103.877	87.9133	83.1243	101.482	101.14	114.595	27.9818	0.036488	39.4527	0.376283	11.4595	7.91334
1600	105.587	97.1494	106.043	108.096	106.728	116.876	89.1676	0.800456	64.6522	9.9772	42.6454	6.21437
3200	99.6579	100.114	97.0353	82.0981	108.78	113.797	108.552	41.9612	99.4299	47.0924	93.6146	64.0821
6400	96.0091	96.1231	93.7286	91.3341	111.516	92.9304	107.868	89.8518	121.095	93.6146	108.438	114.025
12800							115.393	111.973	117.446	106.728	115.507	112.315
25600							108.78	98.4036	95.8951	92.5884	111.859	92.8164

## Sheet: Figure 5H
	1#	2#	3#	4#	5#	6#
Pre	45.05	51.37	39.98	46.62	46.69	48.32
Primary	152.6	393.5	422.4	275.1	317.7	321.6
Boost	986.1	3490	1077	3254	1692	2917
